# Supplementary material for: Shaping the molecular assemblies of native and alkali-modified agars in dilute and concentrated aqueous media via microwave-assisted extraction
Source: Royal Society of Chemistry journal article supplement (doi:10.1039/c3sm27131e), 2013-01-01

# ELECTRONIC SUPPLEMENTARY INFORMATION.

Shaping the molecular assemblies of native and  
alkali-modified agars in dilute and concentrated  
aqueous media *via* microwave-assisted extraction

*Ana M. M. Sousa<sup>1</sup>, João Borges<sup>2</sup>, Fernando Silva<sup>2</sup>, Eurico J. Cabrita<sup>3</sup>, Ana M. Ramos<sup>3</sup>,  
Maria Pilar Gonçalves\*<sup>1</sup>*

<sup>1</sup> REQUIMTE, Faculdade de Engenharia, Universidade do Porto, Rua Dr. Roberto Frias, 4200-465 Porto, Portugal.

<sup>2</sup> Centro de Investigação em Química (CIQ-UP,L4), Departamento de Química e Bioquímica, Faculdade de Ciências, Universidade do Porto, Rua do Campo Alegre 687, 4169-007 Porto, Portugal.

<sup>3</sup> REQUIMTE, CQFB, Faculdade de Ciências e Tecnologia, Universidade Nova de Lisboa, 2829-516 Caparica, Portugal.

\* Corresponding author: (Phone: +351 22 5081400; Fax: +351 22 5081440; E-mail address: [pilarg@fe.up.pt](mailto:pilarg@fe.up.pt))

**Content:**

|                                                                                          |    |
|------------------------------------------------------------------------------------------|----|
| <b>Figure S1.</b> HSQC NMR spectrum of NA in D <sub>2</sub> O .....                      | 3  |
| <b>Figure S2.</b> HSQC NMR spectrum of AA1 in D <sub>2</sub> O .....                     | 4  |
| <b>Figure S3.</b> HSQC NMR spectrum of AA2 in D <sub>2</sub> O.....                      | 5  |
| <b>Figure S4.</b> HMBC NMR spectrum of AA2 in D <sub>2</sub> O .....                     | 6  |
| <b>Figure S5.</b> FTIR spectra of NA, AA and commercial agars .....                      | 7  |
| <b>Figure S6.</b> Topographical (A) and amplitude (B) AFM images of NA at 50 µg/mL.....  | 8  |
| <b>Figure S7.</b> Topographical (A) and amplitude (B) AFM images of AA1 at 50 µg/mL....  | 9  |
| <b>Figure S8.</b> Topographical (A) and amplitude (B) AFM images of AA2 at 50 µg/mL...10 |    |
| <b>Figure S9.</b> Height profile of the AFM image of NA for the 5 µg/mL solution.....    | 11 |
| <b>Figure S10.</b> Height profile of the AFM image of AA1 for the 5 µg/mL solution.....  | 12 |
| <b>Figure S11.</b> Height profile of the AFM image of AA1 for the 5 µg/mL solution.....  | 13 |
| <b>Figure S12.</b> Topographical (A) and amplitude (B) AFM images of NA at 10 µg/mL...14 |    |
| <b>Figure S13.</b> Topographical (A) and amplitude (B) AFM images of AA1 at 10 µg/mL.15  |    |
| <b>Figure S14.</b> Topographical (A) and amplitude (B) AFM images of NA at 10 µg/mL..... | 16 |
| <b>Figure S15.</b> Topographical (A) and amplitude (B) AFM images of AA1 at 10 µg/mL.17  |    |
| <b>Figure S16.</b> Topographical (A) and amplitude (B) AFM images of AA2 at 10 µg/mL.18  |    |

**Figure S1.** 2D  $^1\text{H}$ - $^{13}\text{C}$  HSQC NMR spectrum of NA in  $\text{D}_2\text{O}$  (data obtained at 80 °C with the following conditions: 0.19 s acquisition time, 1.5 s relaxation delay, a spectral width of (5000; 20000) Hz and an average of 128 scans).

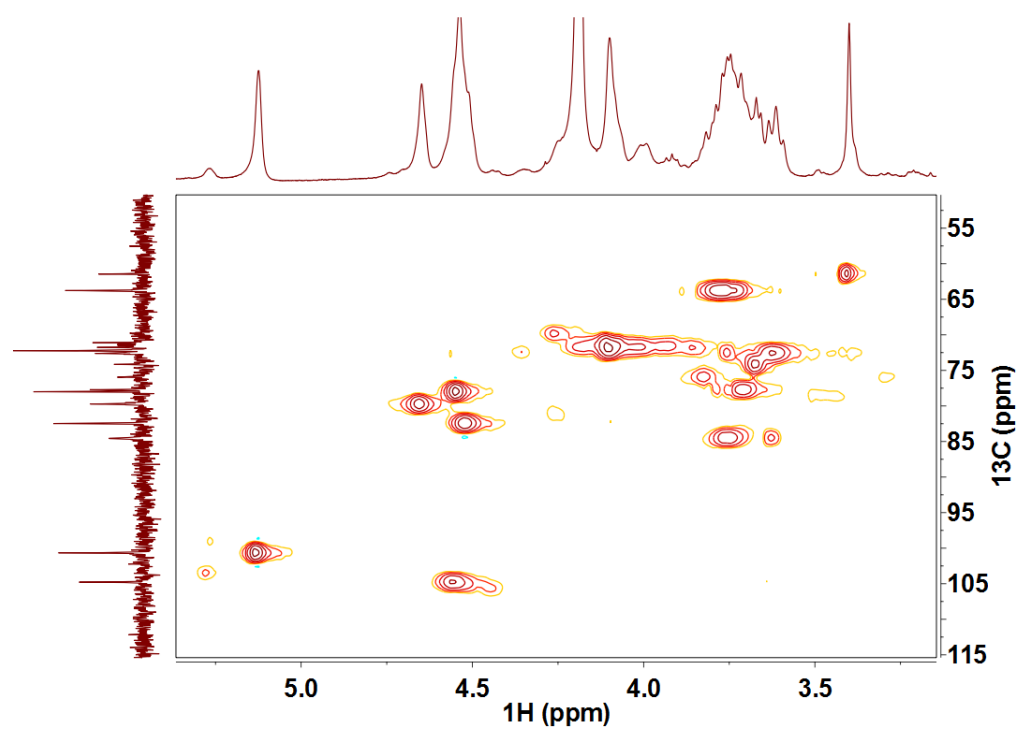

**Figure S2.** 2D  $^1\text{H}$ - $^{13}\text{C}$  HSQC NMR spectrum of AA1 in  $\text{D}_2\text{O}$  (data obtained at 80 °C with the following conditions: 0.19 s acquisition time, 1.5 s relaxation delay, a spectral width of (5000; 20000) Hz and an average of 128 scans).

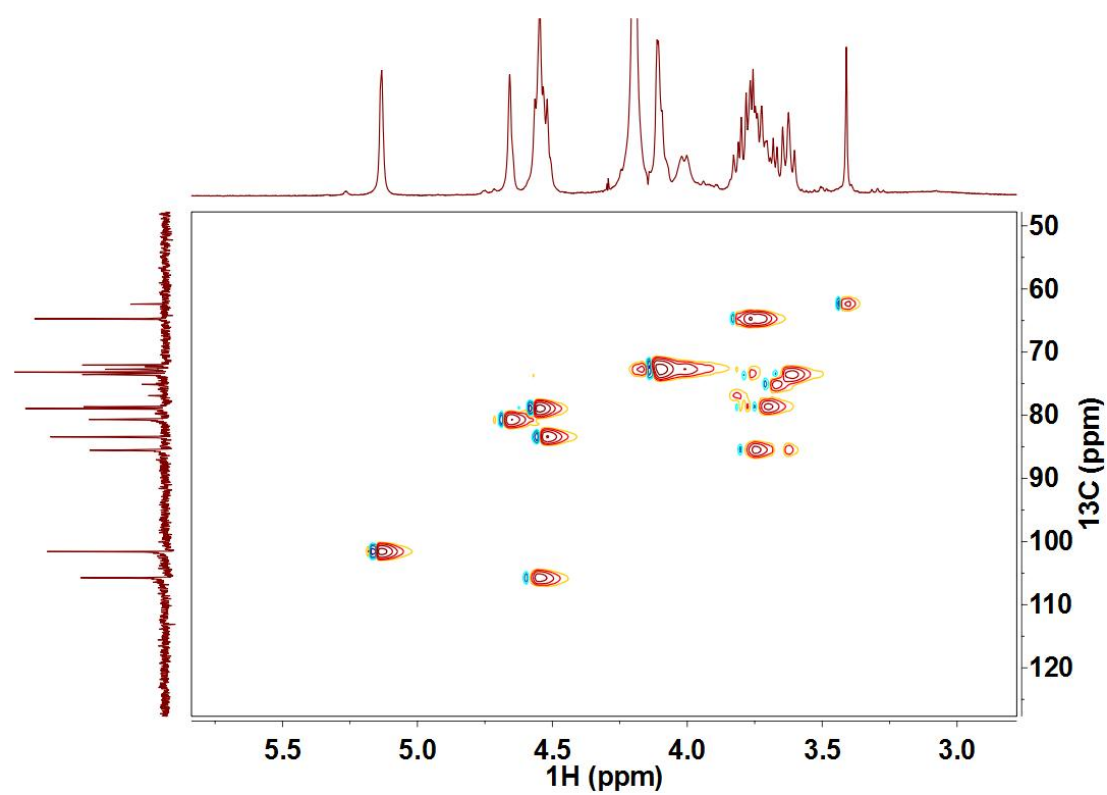

**FIGURE S3.** 2D  $^1\text{H}$ - $^{13}\text{C}$  HSQC NMR spectrum of AA2 in  $\text{D}_2\text{O}$  (data obtained at 80 °C with the following conditions: 0.19 s acquisition time, 1.5 s relaxation delay, a spectral width of (5000; 20000) Hz and an average of 128 scans).

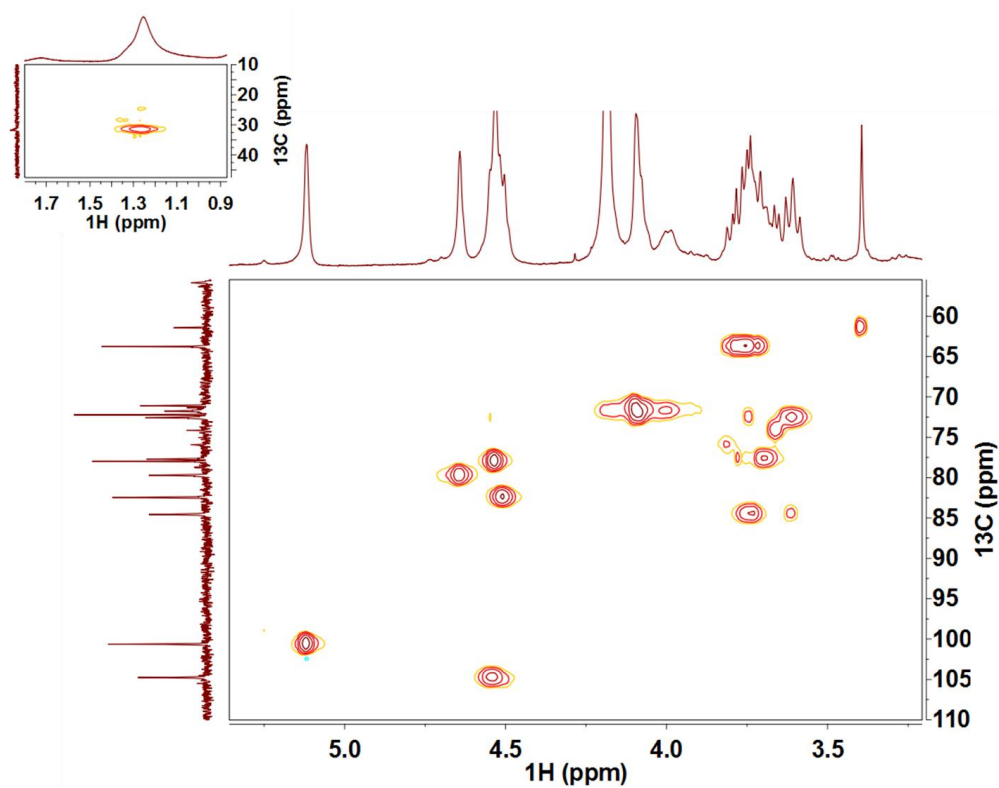

**Figure S4.** 2D  $^1\text{H}$ - $^{13}\text{C}$  HMBC NMR spectrum of AA2 in  $\text{D}_2\text{O}$  (data obtained at 80 °C with the following conditions: 1.42 s acquisition time, 2.0 s relaxation delay, a spectral width of (5000; 23000) Hz and an average of 72 scans).

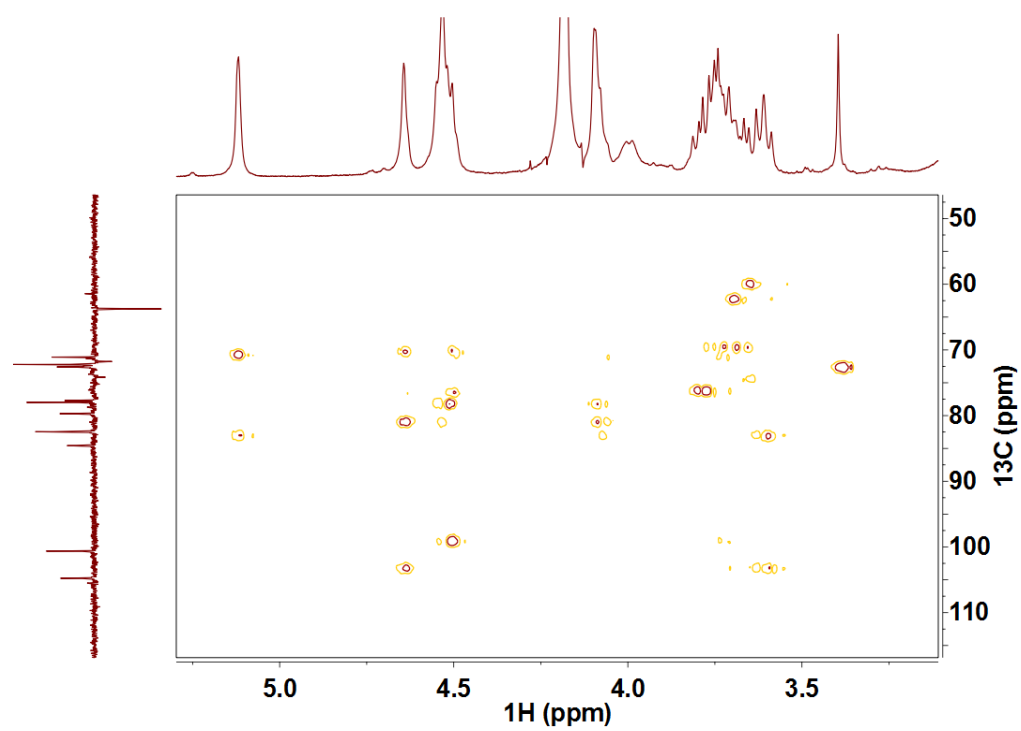

**Figure S5.** FTIR spectra of NA, AA and commercial agars. Bands assigned to total sulfate esters ( $1250\text{ cm}^{-1}$ ; a) and LA ( $930\text{ cm}^{-1}$ ; b) used in the  $A_{930}/A_{1250}$  calculation, are marked accordingly.

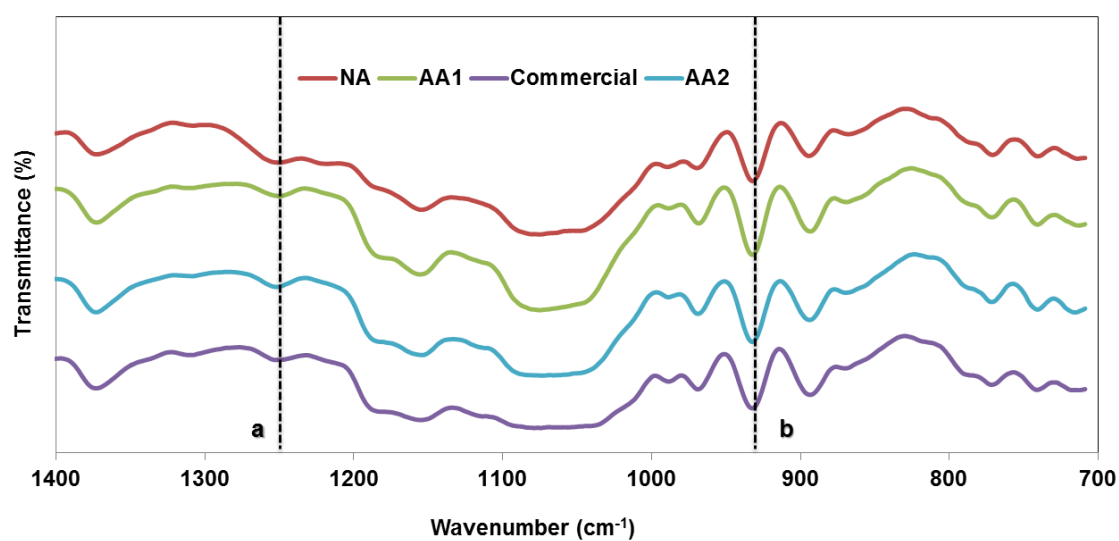

**Figure S6.** Topographical (**A**) and amplitude (**B**) AFM images of NA structures formed on the 50  $\mu\text{g/mL}$  dilute aqueous solutions when deposited onto mica and air dried. The image size is 5  $\mu\text{m} \times 5 \mu\text{m}$ . Examples of NA aggregates are identified by number 1.

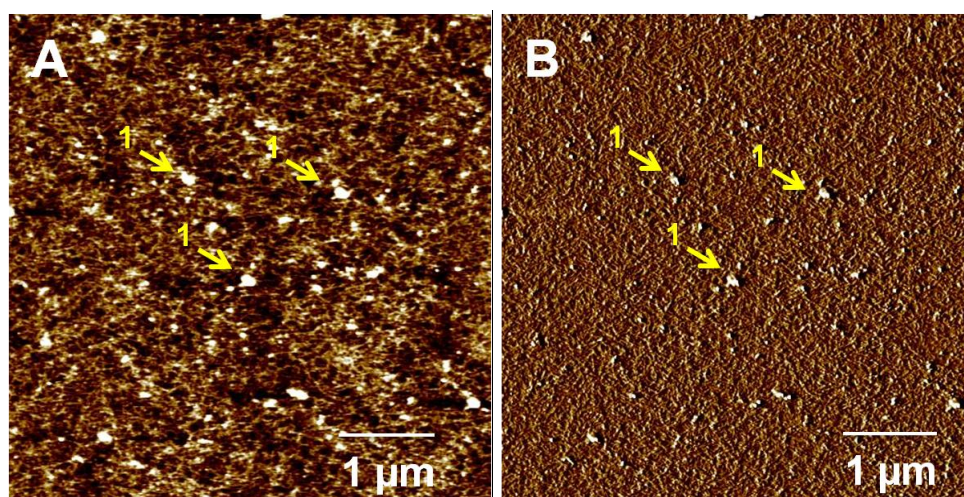



**Figure S7.** Topographical (A) and amplitude (B) AFM images of AA1 structures formed on the 50  $\mu\text{g/mL}$  dilute aqueous solution deposited on mica and air dried. The image size is 5  $\mu\text{m} \times 5 \mu\text{m}$ . Examples of AA1 aggregates are identified by number 1.

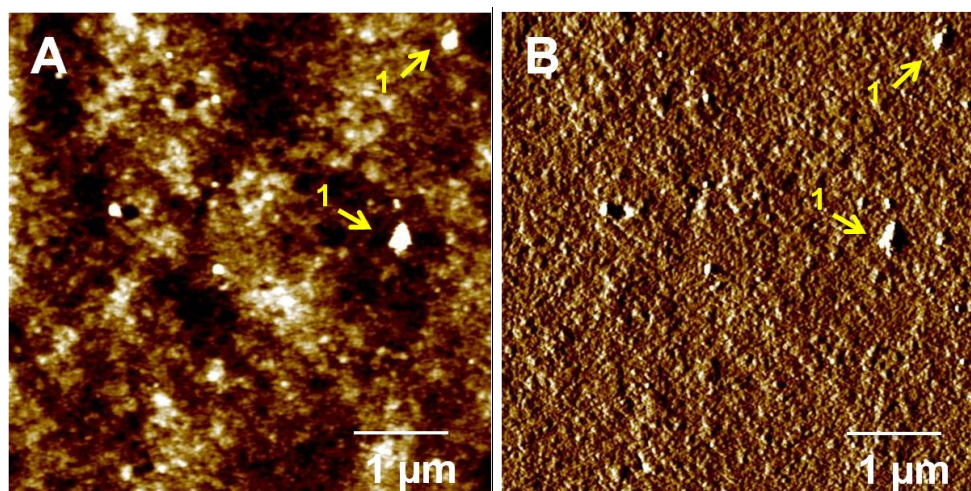

**Figure S8.** Topographical (A) and amplitude (B) AFM images of AA2 structures formed on the 50  $\mu\text{g/mL}$  dilute aqueous solution deposited on mica and air dried. The image size is 5  $\mu\text{m} \times 5 \mu\text{m}$ . Example of AA2 aggregates are identified by number 1.

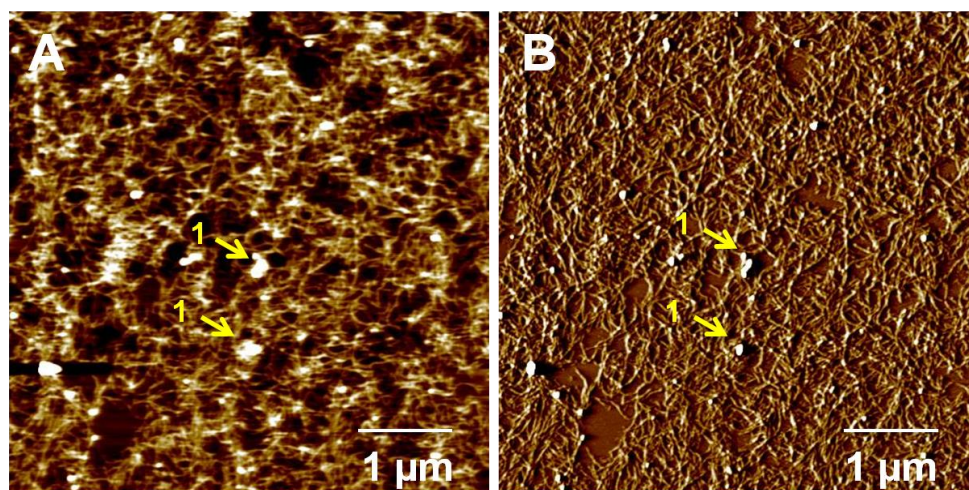

**Figure S9.** Height profile corresponding to structures along the straight line over the topographic AFM image of NA for the 5  $\mu\text{g/mL}$  solution displayed in Figure 6A/B of the manuscript.

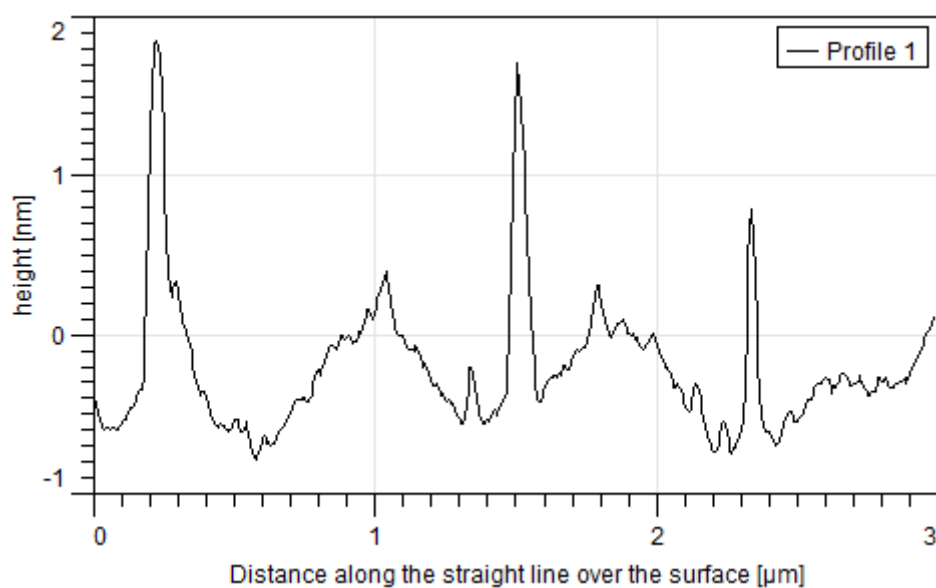

**Figure S10.** Height profile corresponding to the structures along the straight line over the topographic AFM image of AA1 for the 5  $\mu\text{g}/\text{mL}$  solution displayed in 6C/D of the manuscript.

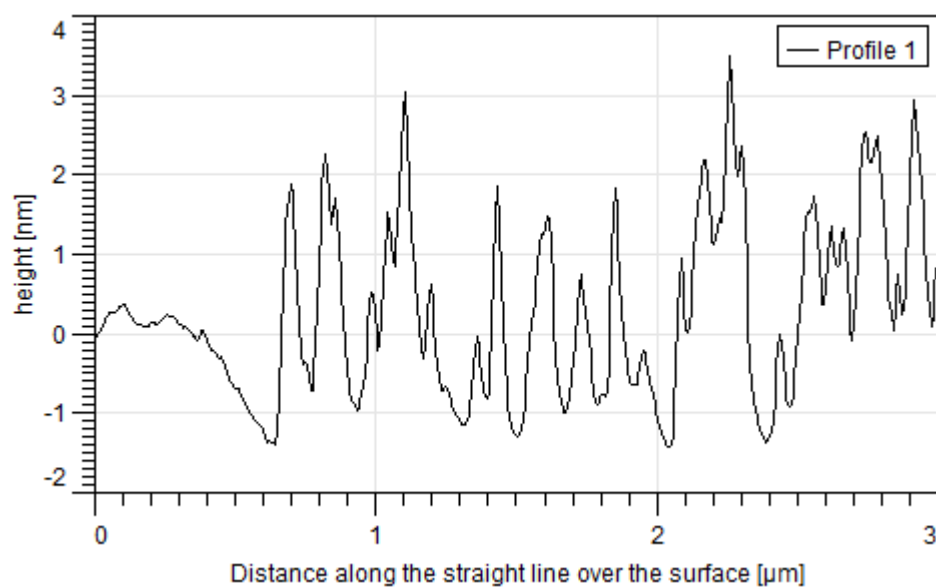

**Figure S11.** Height profile corresponding to the structures along the straight line over the topographic AFM image of AA2 for the 5  $\mu\text{g}/\text{mL}$  solution displayed in Figure 6E/F of the manuscript.

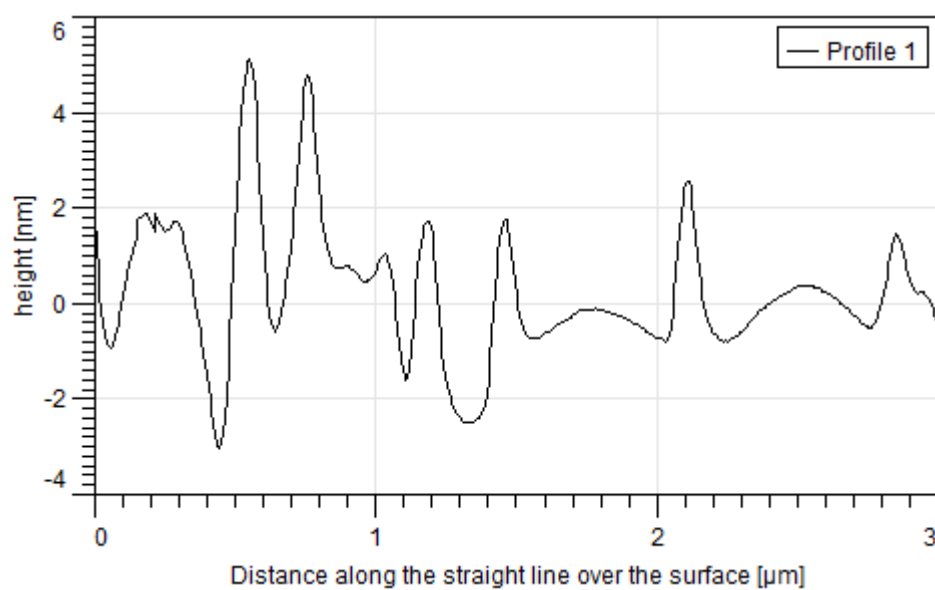

**Figure S12.** Topographical (A) and amplitude (B) AFM images of NA structures formed on the 10  $\mu\text{g/mL}$  dilute aqueous solution when deposited on mica and air dried. The image size is 3  $\mu\text{m} \times 3 \mu\text{m}$ .

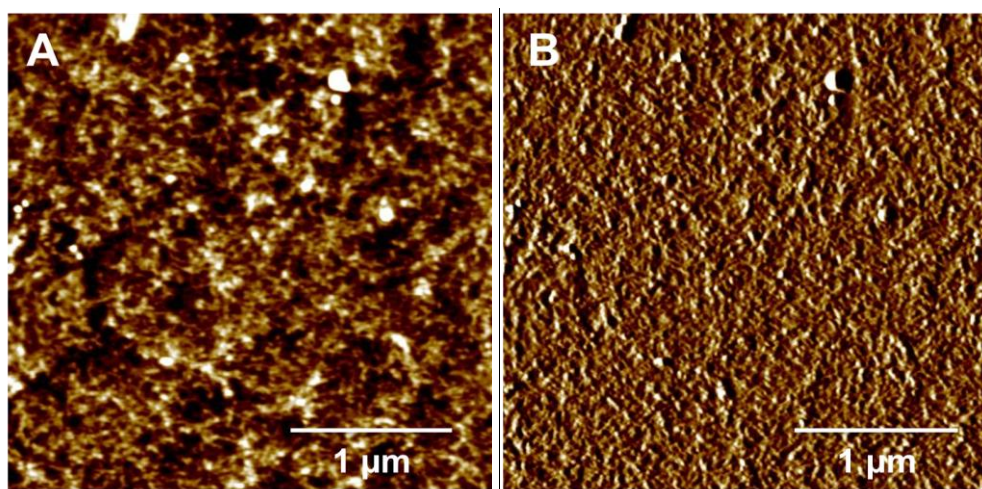



**Figure S13.** Topographical (A) and amplitude (B) AFM images of AA1 structures formed on the 10  $\mu\text{g/mL}$  dilute aqueous solution when deposited on mica and air dried. The image size is 3  $\mu\text{m} \times 3 \mu\text{m}$ .

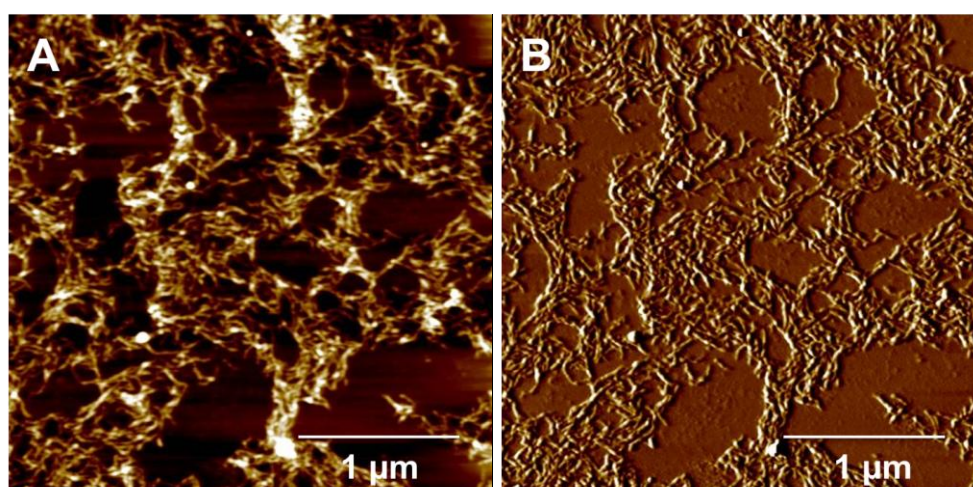

**Figure S14.** Topographical (A) and amplitude (B) AFM images of NA structures formed on the 100  $\mu\text{g}/\text{mL}$  dilute aqueous solution when deposited on mica and air dried. The image size is 3  $\mu\text{m} \times 3 \mu\text{m}$ .

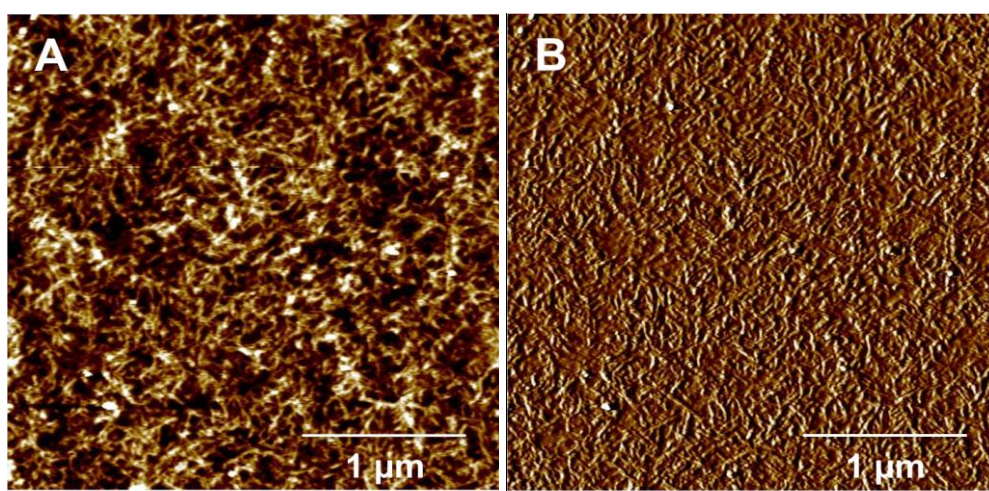



**Figure S15.** Topographical (A) and amplitude (B) AFM images of AA1 structures formed on the 100  $\mu\text{g/mL}$  dilute aqueous solution when deposited on mica and air dried. The image size is 3  $\mu\text{m} \times 3 \mu\text{m}$ .

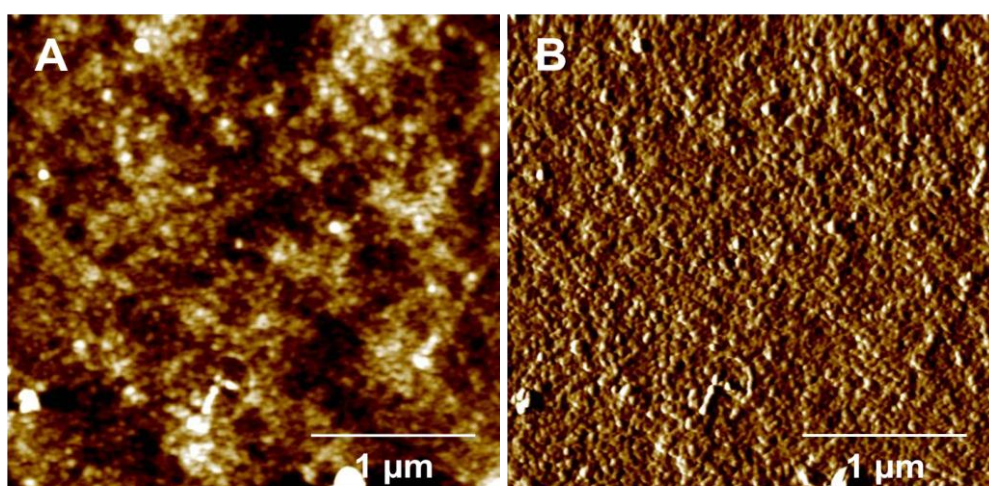

**Figure S16.** Topographical (A) and amplitude (B) AFM images of AA2 structures formed on the 100  $\mu\text{g}/\text{mL}$  dilute aqueous solution deposited on mica and air dried. The image size is 3  $\mu\text{m} \times 3 \mu\text{m}$ .

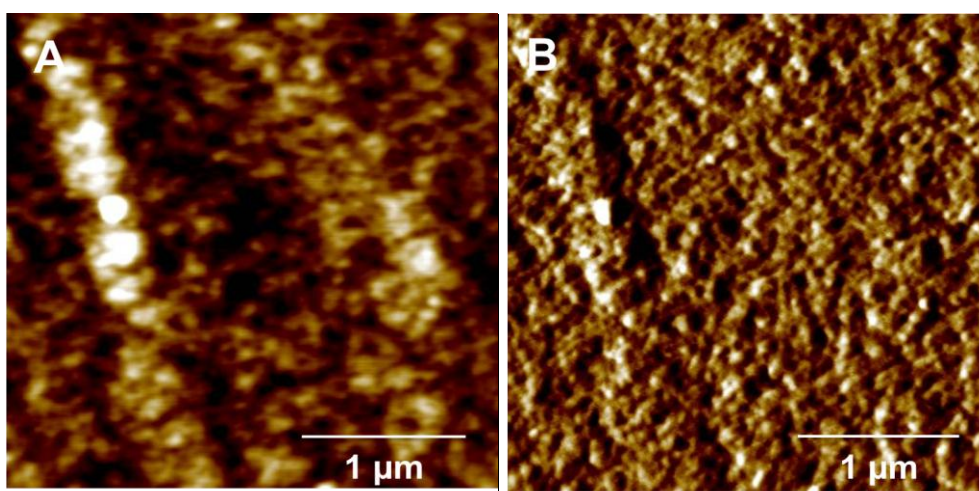

Supplement: c3sm27131e.pdf [file c3sm27131e.pdf]
